# Supplementary material
Source: Springer Nature journal article supplement (https://www.springermedizin.de/resource/supplementary/12937_2013_636_MOESM3_ESM.pdf/25653832)
Supplement: MOESM3 [file 25653832]

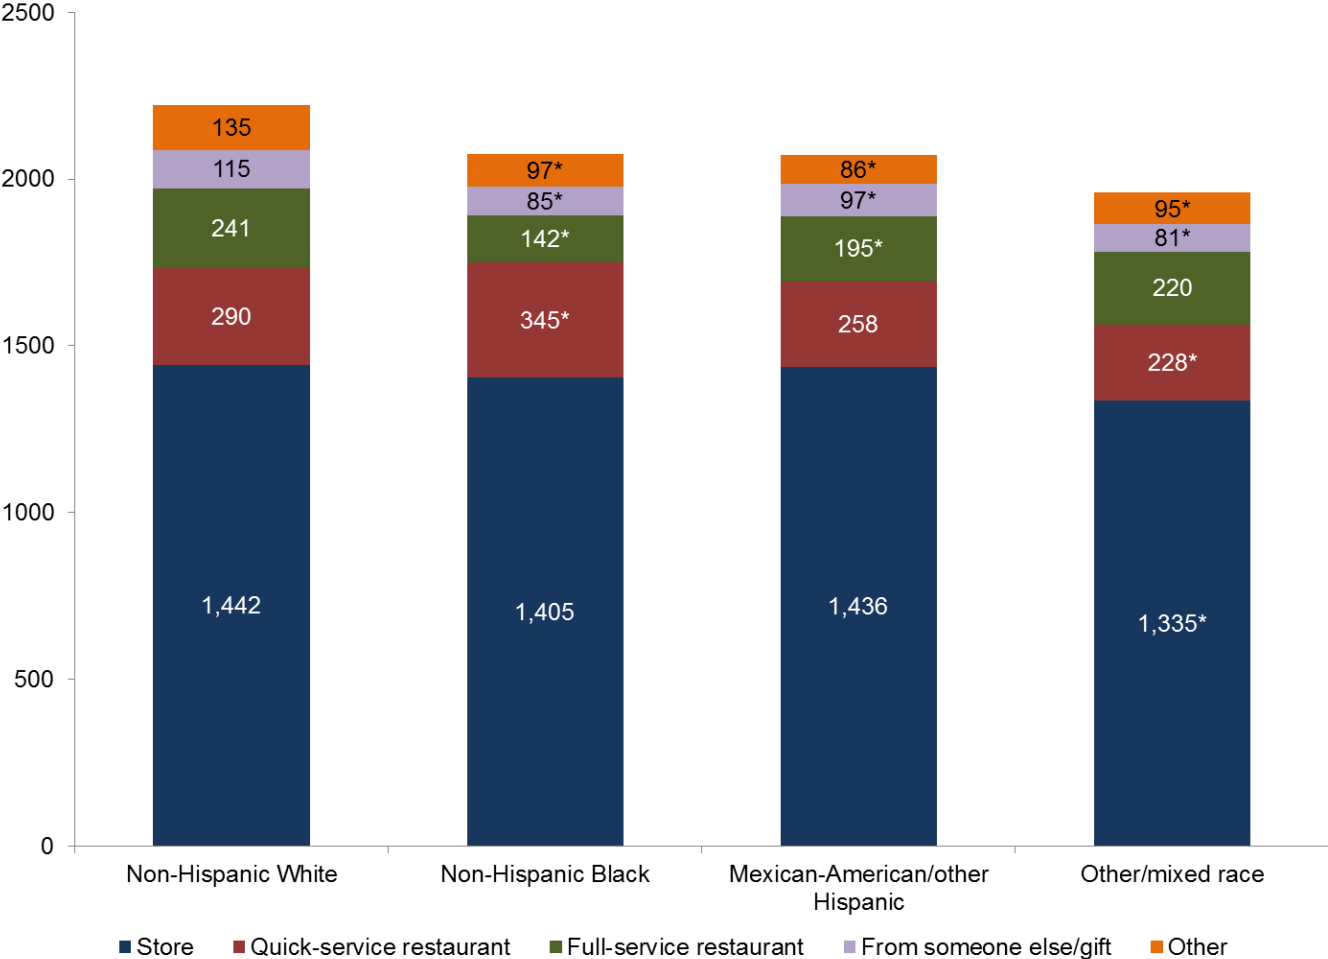

\* Indicates significant difference (p<0.05) compared to non-Hispanic white value after adjusting for age.
